# Supplementary material for: Sexually-Driven Combinatorial Diversity in Native Saccharomyces Wine Yeasts
Source: MDPI journal article supplement (doi:10.3390/fermentation8100569), 2022-10-21
Supplement: s1 [file s1]

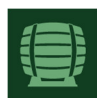

## Supplementary Table S1

**Table S1.** Strains used in this study. Killer related genotypes/phenotypes are shown.

| Name    | L-A type | M type | Resistance to killer toxin |
|---------|----------|--------|----------------------------|
| YPX0-1  | -        | -      | K2                         |
| YPX0-3  | -        | -      | K2                         |
| YPX0-4  | L-A-2    | M2     | Untested                   |
| YPX0-5  | -        | -      | K2                         |
| YPX0-6  | -        | -      | -                          |
| YPX0-7  | -        | -      | K1, K2                     |
| YPX0-8  | L-A-lus  | M2     | Untested                   |
| YPX0-10 | -        | -      | K2                         |
| YPX1-1  | L-A-2    | M2     | Untested                   |
| YPX1-2  | -        | -      | K2, Klus                   |
| YPX1-3  | -        | -      | K2                         |
| YPX1-4  | -        | -      | K2                         |
| YPX1-7  | L-A-2    | M2     | Untested                   |
| YPX1-8  | L-A-lus  | M2     | Untested                   |
| YPX1-9  | -        | -      | K2                         |
| YPX1-10 | L-A-2    | M2     | Untested                   |
| YPX2-1  | L-A-lus  | M2     | Untested                   |
| YPX2-2  | -        | -      | K2                         |
| YPX2-3  | L-A-lus  | M2     | Untested                   |
| YPX2-4  | L-A-2    | M2     | Untested                   |
| YPX2-5  | -        | -      | K2                         |
| YPX2-6  | L-A-2    | M2     | Untested                   |
| YPX2-7  | -        | -      | K2                         |
| YPX2-8  | -        | -      | K2                         |
| YPX2-9  | -        | -      | K2, Klus                   |
| YPX2-10 | -        | -      | -                          |
| SPX0-1  | -        | -      | K2                         |
| SPX0-2  | -        | -      | K2, Klus                   |
| SPX0-4  | -        | -      | K2                         |
| SPX0-5  | -        | -      | K2                         |
| SPX0-6  | L-A-lus  | M2     | Untested                   |
| SPX0-7  | -        | -      | K2                         |
| SPX0-8  | L-A-lus  | M2     | Untested                   |
| SPX0-10 | -        | -      | K2                         |
| SPX1-2  | -        | -      | K2                         |
| SPX1-3  | L-A-lus  | M2     | Untested                   |
| SPX1-4  | L-A-lus  | M2     | Untested                   |
| SPX1-5  | -        | -      | K1, K2                     |
| SPX1-7  | -        | -      | K2                         |
| SPX1-8  | -        | -      | K2                         |
| SPX1-9  | L-A-2    | M2     | Untested                   |
| SPX1-10 | -        | -      | -                          |
| SPX2-1  | L-A-2    | M2     | Untested                   |
| SPX2-3  | -        | -      | K2, Klus                   |
| SPX2-4  | L-A-lus  | M2     | Untested                   |
| SPX2-5  | -        | -      | K2                         |
| SPX2-6  | L-A-2    | M2     | Untested                   |
| SPX2-8  | -        | -      | K2, Klus                   |
| SPX2-9  | -        | -      | K2                         |
| YGF0-10 | L-A-lus  | M2     | Untested                   |

|         |         |    |          |
|---------|---------|----|----------|
| YGF1-2  | -       | -  | K1, K2   |
| YGF1-6  | L-A-lus | M2 | Untested |
| YGF1-10 | -       | -  | K1, K2   |
| YGF2-3  | -       | -  | K2       |
| YGF2-5  | -       | -  | K1, K2   |
| YGF2-7  | -       | -  | K2       |
| YGF2-8  | -       | -  | K2       |
| YGF2-9  | L-A-2   | M2 | Untested |
| YGF2-10 | -       | -  | K2, Klus |
| SGF0-1  | -       | -  | K2       |
| SGF0-3  | -       | -  | -        |
| SGA0-5  | -       | -  | K2, Klus |
| SGF0-7  | -       | -  | K2       |
| SGF0-9  | -       | -  | K2       |
| SGF1-1  | -       | -  | K2       |
| SGF1-2  | -       | -  | K2       |
| SGF1-6  | L-A-2   | M2 | Untested |
| SGF1-7  | L-A-lus | M2 | Untested |
| SGF1-9  | -       | -  | K2       |
| SGF1-10 | L-A-lus | M2 | Untested |
| SGF2-1  | -       | -  | K2, Klus |
| SGF2-4  | -       | -  | K2       |
| SGF2-6  | -       | -  | K2       |
| SZA0-1  | L-A-lus | M2 | Untested |
| SZA0-2  | -       | -  | K2       |
| SZA0-3  | L-A-lus | M2 | Untested |
| SZA0-5  | L-A-2   | M2 | Untested |
| SZA0-8  | L-A-2   | M2 | Untested |
| SZA0-9  | -       | -  | K2, Klus |
| SZA0-10 | -       | -  | K2       |
| SZA1-1  | -       | -  | K2       |
| SZA1-2  | -       | -  | K2       |
| SZA1-3  | -       | -  | K2, Klus |
| SZA1-4  | L-A-lus | M2 | Untested |
| SZA1-6  | -       | -  | K2       |
| SZA1-7  | -       | -  | K2       |
| SZA1-8  | -       | -  | K2       |
| SZA2-1  | L-A-2   | M2 | Untested |
| SZA2-2  | L-A-2   | M2 | Untested |
| SZA2-3  | -       | -  | K2       |
| SZA2-4  | -       | -  | K2       |
| SZA2-5  | -       | -  | K2       |
| SZA2-7  | -       | -  | K2       |
| SZA2-9  | L-A-2   | M2 | Untested |
